# Supplementary material for: Facile synthesis and magnetic phase transformation of Nd–Fe–B nanoclusters by oxygen bridging
Source: Royal Society of Chemistry journal article supplement (doi:10.1039/c2tc00083k), 2012-10-11
Supplement: c2tc00083k.pdf [file c2tc00083k.pdf]

## Facile Synthesis and Magnetic Phase Transformation of Nd-Fe-B Nanoclusters by Oxygen Bridging

By Chang Woo Kim,<sup>a</sup> Young Hwan Kim,<sup>b</sup> Umapada Pal<sup>c</sup> and Young Soo Kang<sup>a,\*</sup>

<sup>a</sup> Korea Center for Artificial Photosynthesis, Department of Chemistry, Sogang University, Seoul, 121-742, Republic of Korea. Fax: 82 2 701 0967; Tel: 82 2 701 6379; E-mail: yskang@sogang.ac.kr

<sup>b</sup> Department of Functional Layers, GMBU e.V, D-01317 Dresden, Germany.

<sup>c</sup> Department of Physics, Instituto de Fisica, Universidad Autonoma de Puebla, Puebla 72570, Mexico.

### 1. Analysis of the surface charge of the Fe-B particles by using a zeta potential analyzer

In order to analyze the surface charge on the Fe-B nanoparticles, the Fe-B nanoparticles and Nd-Fe-B nanoclusters were synthesized in aqueous borohydride solution. The as-synthesized Fe-B nanoparticles and the as-synthesized Nd-Fe-B nanoclusters were then immersed in cyclohexane as a solvent in order to prevent surface reactions, such as oxidation. The surface charge on both types of nanoparticle was then measured by a zeta potential analyzer ver. 2.18 (Brookhaven Instruments Corp). Figure S1 show that the mean zeta potential values of Fe-B and Nd-Fe-B nanoparticles were measured as -39.73 mV and 43.95 mV, respectively. This result indicates that the electrostatic interaction between Nd cations and the negatively charged Fe-B surface helps to reduce the Nd<sup>3+</sup> even with its high reduction potential.

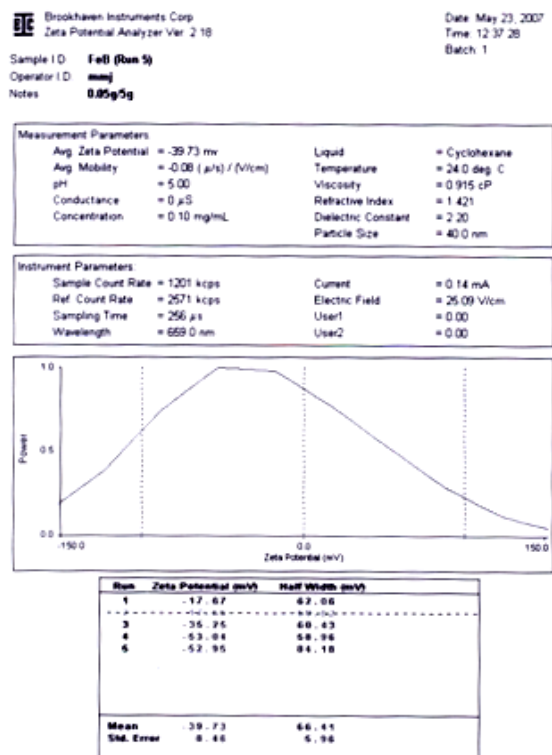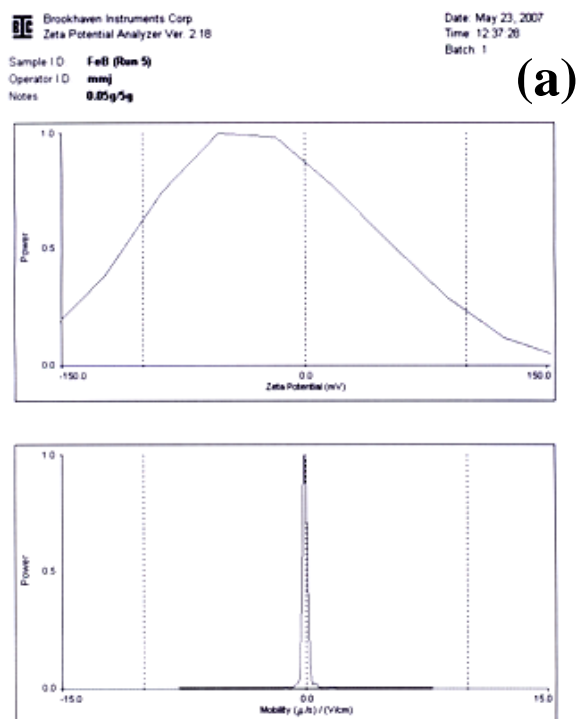

(a)

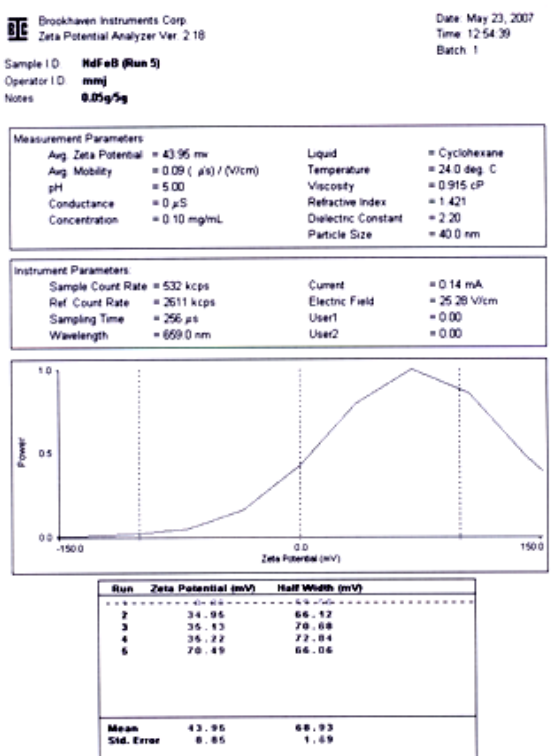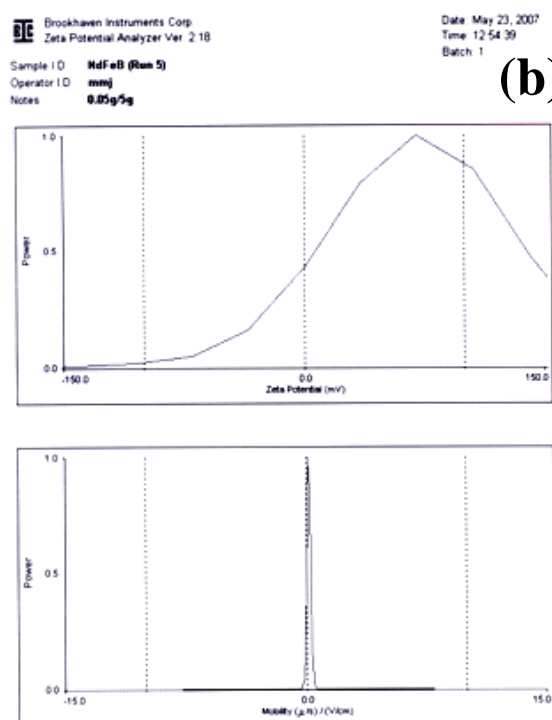

(b)

**Figure S1.** Surface charge analysis of as-synthesized (a) Fe-B, and (b) Nd-Fe-B nanoclusters using a zeta potential analyzer.

## 2. TEM micrographs of Fe-B nanoparticle and Nd-Fe-B nanocluster

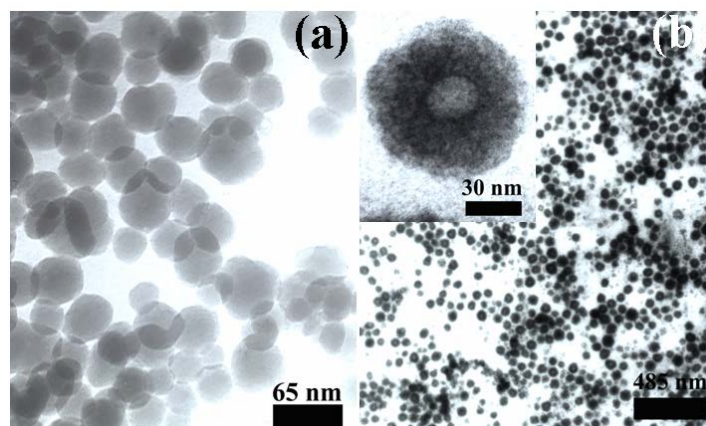

**Figure S2.** TEM micrographs of (a) Fe-B nanoparticles and (b) Nd-Fe-B nanoclusters under the same conditions.

Compared with the TEM micrograph Figure S2(a) of Fe-B nanoparticles, for example, for Nd-Fe-B nanoclusters, Figure S2(b) shows that the individual nanosphere is composed of smaller nanoparticles. The presence of a Ln element can make the different morphology of both phases from the results identified with various analyzer. After being dispersed with ultrasonic agitation, the individual nanosphere is composed of aggregate-like particle with diameter of 2 nm Figure S2(b). Figures S2 and S3 demonstrate that the Fe-B and Nd-Fe-B phases proceed through the separated nucleation and growth of nanoparticles in this system. Note the discrete structure of Nd-Fe-B nanoclusters compared with that of Fe-B nanophase.

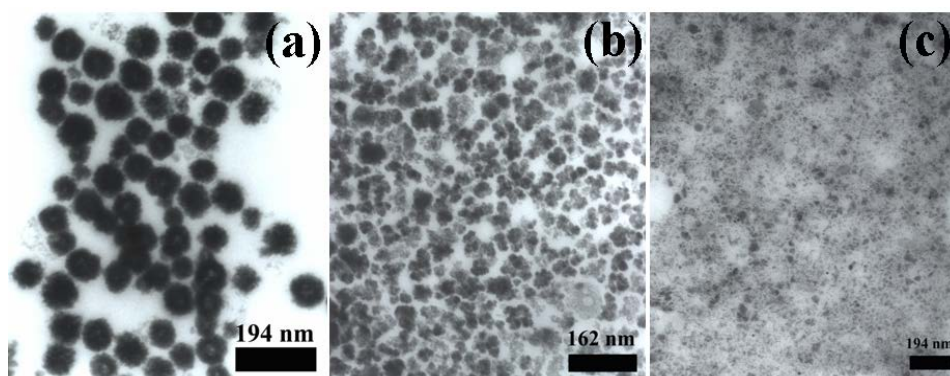

**Figure S3.** TEM micrographs of (a) as-synthesized Nd-Fe-B nanoclusters, (b) the products after dispersion with ultra-sonic agitation for 10 min, and (c) after agitation 20 min.
